# Supplementary material for: Methanol biotransformation toward high-level production of fatty acid derivatives by engineering the industrial yeast Pichia pastoris
Source: PubMed Central journal article supplement — Proc Natl Acad Sci U S A. 2022 Jul 11;119(29):e2201711119. doi: 10.1073/pnas.2201711119 (PMC9303929; doi:10.1073/pnas.2201711119), 2022-07-11
Supplement: pnas.2201711119.sapp.pdf [file pnas.2201711119.sapp.pdf]

## Supplementary Information for

Methanol biotransformation toward high-level production of fatty acid derivatives by engineering the industrial yeast *Pichia pastoris*.

Peng Cai, Xiaoyan Wu, Jun Deng, Linhui Gao, Yiwei Shen, Lun Yao, Yongjin J. Zhou\*

Yongjin J. Zhou

Email: zhouyongjin@dicp.ac.cn

### This PDF file includes:

Supplementary text

Figures S1 to S6

Tables S1 to S3

SI References

## Supplementary Figures

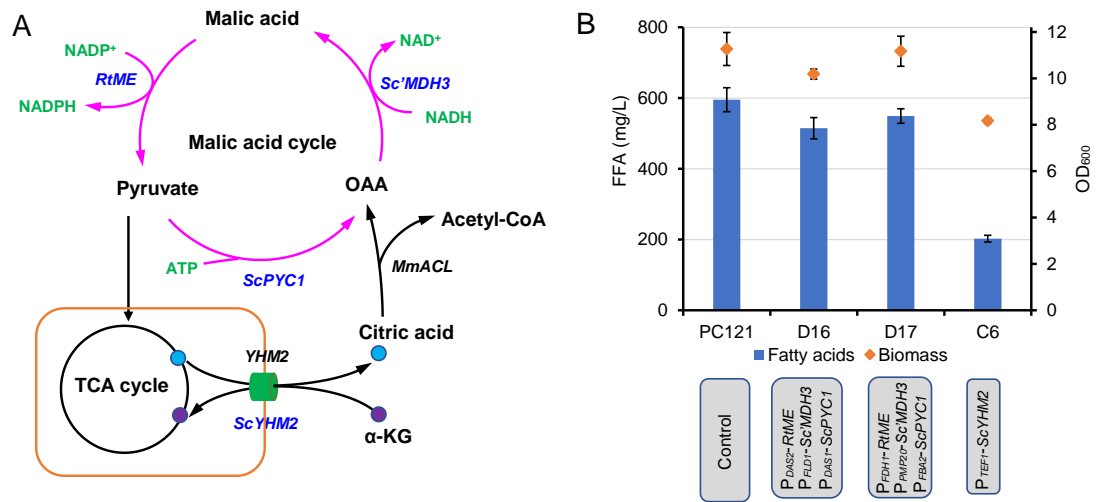

**Figure S1. Construction of malate cycle (transhydrogenase cycle) in cytoplasm.** (A) Schematic diagram of malate cycle. Overexpressed genes are marked in light blue. (B) FFA production in engineered strains. Error bars correspond to the SD of the mean ( $n = 3$ , corresponding to three biological replicates)

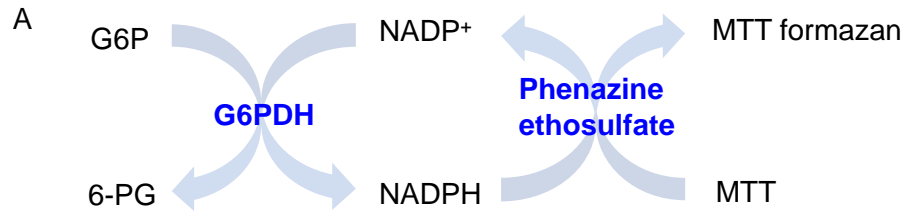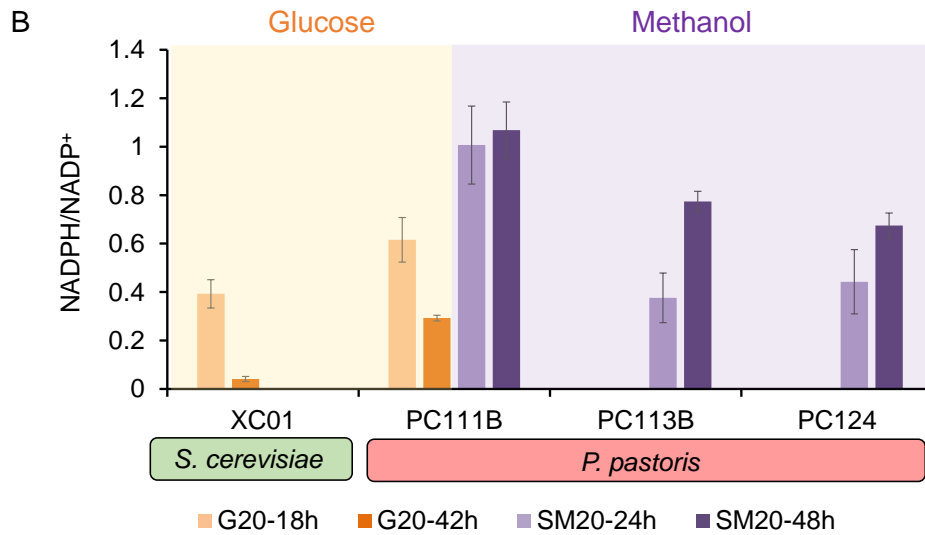

**Figure S2. Quantification of NADPH/NADP<sup>+</sup> in *S. cerevisiae* and *P. pastoris*.** (A) Schematic diagram of cofactor recycling assay. (B) NADPH/NADP<sup>+</sup> of *S. cerevisiae* and *P. pastoris* (PC111B) in glucose medium and methanol medium. PC111B, wild type; PC113B, FFA-producing strain with blocked FFA activation; PC124, FFA over-producing strain with engineered central metabolism. \*Due to the slow growth of PC113B, the sampling time was delayed by 24 h. Error bars correspond to the SD of the mean (n = 3, corresponding to three biological replicates).

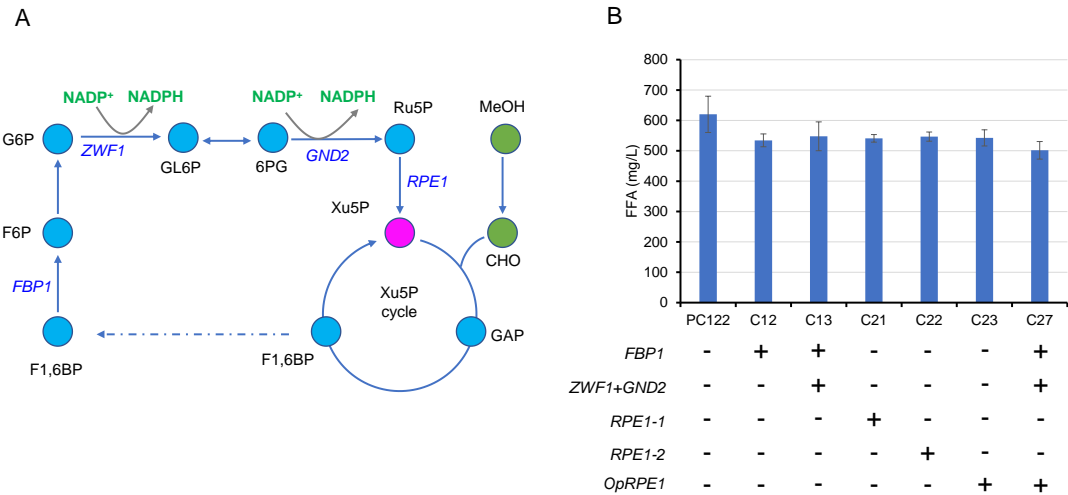

**Figure S3. Enhancing gluconeogenesis pathway to increase Xu5p supply.** (A) Schematic diagram of gluconeogenesis pathway engineering. Overexpressed genes are marked in light blue. (B) FFA production in engineered strains with rewired gluconeogenesis pathway. Error bars correspond to the SD of the mean ( $n = 3$ , corresponding to three biological replicates).

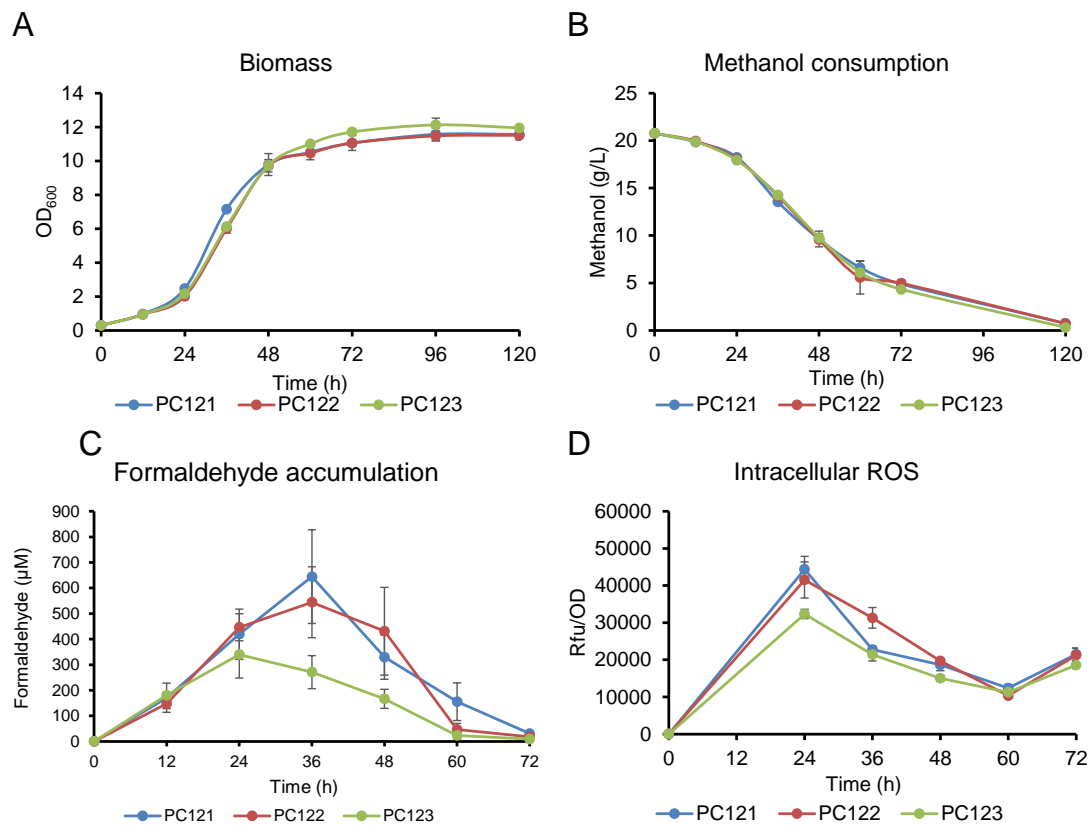

**Figure S4. Rewiring central metabolism for improving FFA production from methanol.** (A-D) The growth curves, methanol consumption, formaldehyde accumulation and intracellular ROS level. Error bars represent SD of triplicate samples.

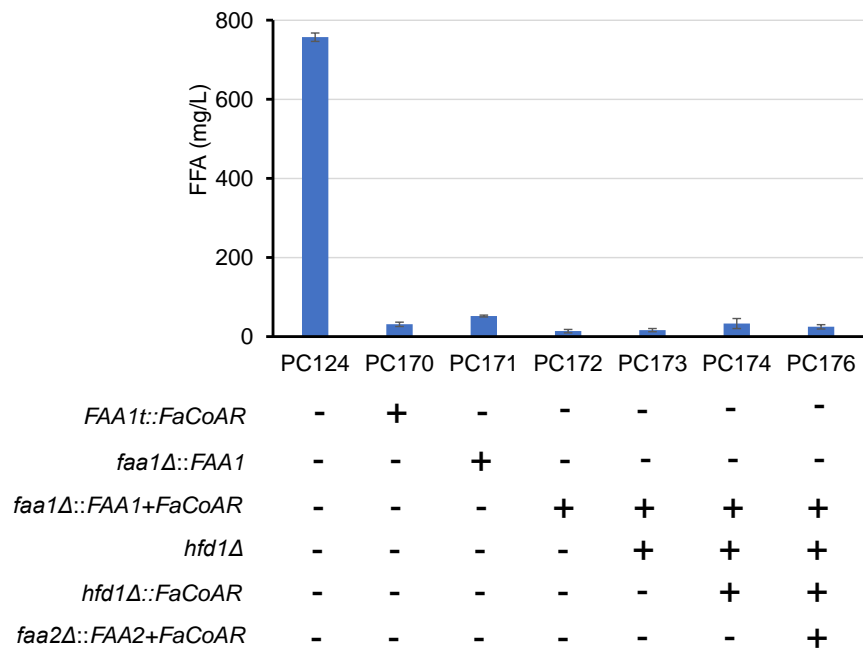

**Figure S5. FFA accumulation of the fatty alcohols producing strains.** Error bars correspond to the SD of the mean (n = 3, corresponding to three biological replicates)

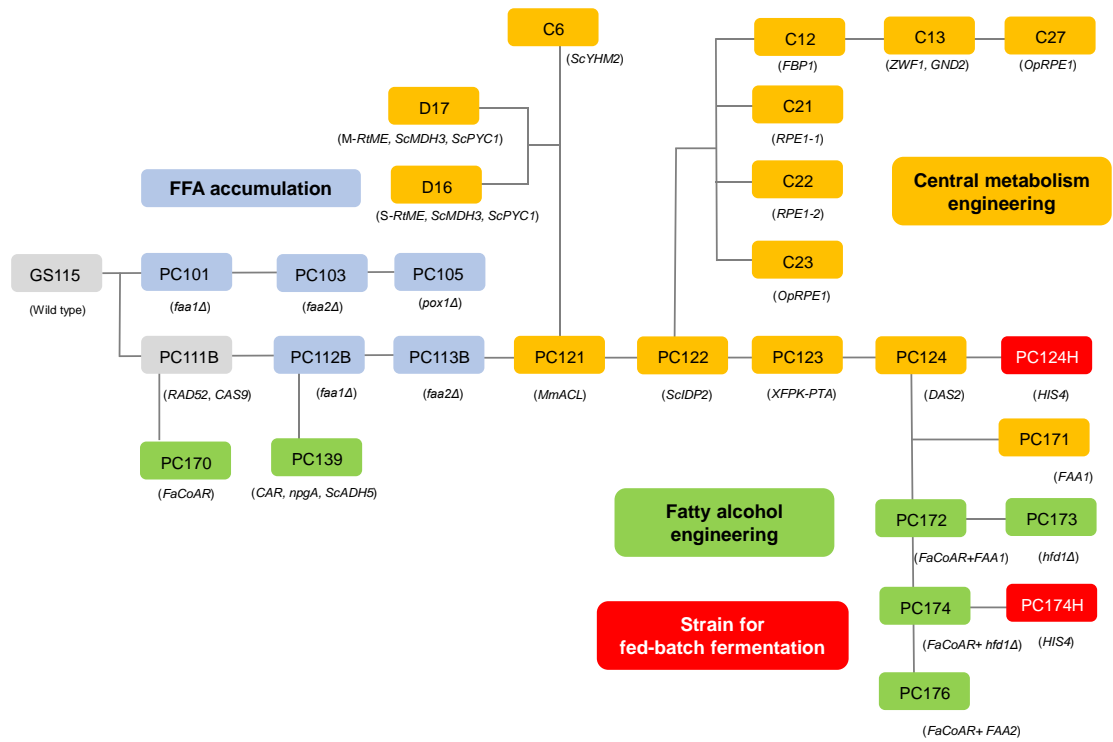

Figure S6. Flowchart of yeast strain construction in this study.

## Supplementary Tables

**Table S1. Plasmids used in this study.**

| Plasmid name       | Genotype or characteristic                                                                                                | Resource or Reference |
|--------------------|---------------------------------------------------------------------------------------------------------------------------|-----------------------|
| pPICZ-Cas9-gFAA1   | panARS, <i>Ble<sup>R</sup></i> , P <sub>HTX1</sub> -Cas9-T <sub>DAS1</sub> , P <sub>HTX1</sub> -gFAA1-T <sub>AOX1</sub>   | (1)                   |
| pPICZ-Cas9-gFAA2   | panARS, <i>Ble<sup>R</sup></i> , P <sub>HTX1</sub> -Cas9-T <sub>DAS1</sub> , P <sub>HTX1</sub> -gFAA2-T <sub>AOX1</sub>   | (1)                   |
| pPICZ-Cas9-gPOX1   | panARS, <i>Ble<sup>R</sup></i> , P <sub>HTX1</sub> -Cas9-T <sub>DAS1</sub> , P <sub>HTX1</sub> -gPOX1-T <sub>AOX1</sub>   | This study            |
| pPICZ-Cas9-gHFD1   | panARS, <i>Ble<sup>R</sup></i> , P <sub>HTX1</sub> -Cas9-T <sub>DAS1</sub> , P <sub>HTX1</sub> -gHFD1-T <sub>AOX1</sub>   | (1)                   |
| pPICZ-Cas9-gHIS4   | panARS, <i>Ble<sup>R</sup></i> , P <sub>HTX1</sub> -Cas9-T <sub>DAS1</sub> , P <sub>HTX1</sub> -gHIS4-T <sub>AOX1</sub>   | (1)                   |
| pPICZ-Cas9-gPNSI2  | panARS, <i>Ble<sup>R</sup></i> , P <sub>HTX1</sub> -Cas9-T <sub>DAS1</sub> , P <sub>HTX1</sub> -gPNSI2-T <sub>AOX1</sub>  | (1)                   |
| pPICZ-Cas9-gPNSI3  | panARS, <i>Ble<sup>R</sup></i> , P <sub>HTX1</sub> -Cas9-T <sub>DAS1</sub> , P <sub>HTX1</sub> -gPNSI3-T <sub>AOX1</sub>  | (1)                   |
| pPICZ-Cas9-gPNSI4  | panARS, <i>Ble<sup>R</sup></i> , P <sub>HTX1</sub> -Cas9-T <sub>DAS1</sub> , P <sub>HTX1</sub> -gPNSI4-T <sub>AOX1</sub>  | (1)                   |
| pPICZ-Cas9-gPNSI5  | panARS, <i>Ble<sup>R</sup></i> , P <sub>HTX1</sub> -Cas9-T <sub>DAS1</sub> , P <sub>HTX1</sub> -gPNSI5-T <sub>AOX1</sub>  | (1)                   |
| pPICZ-Cas9-gPNSI6  | panARS, <i>Ble<sup>R</sup></i> , P <sub>HTX1</sub> -Cas9-T <sub>DAS1</sub> , P <sub>HTX1</sub> -gPNSI6-T <sub>AOX1</sub>  | (1)                   |
| pPICZ-Cas9-gPNSI8  | panARS, <i>Ble<sup>R</sup></i> , P <sub>HTX1</sub> -Cas9-T <sub>DAS1</sub> , P <sub>HTX1</sub> -gPNSI8-T <sub>AOX1</sub>  | (1)                   |
| pPICZ-Cas9-gPNSI10 | panARS, <i>Ble<sup>R</sup></i> , P <sub>HTX1</sub> -Cas9-T <sub>DAS1</sub> , P <sub>HTX1</sub> -gPNSI10-T <sub>AOX1</sub> | (1)                   |
| pPICZ-Cas9-gPNSI12 | panARS, <i>Ble<sup>R</sup></i> , P <sub>HTX1</sub> -Cas9-T <sub>DAS1</sub> , P <sub>HTX1</sub> -gPNSI12-T <sub>AOX1</sub> | (1)                   |



|                    |                                                                                  |            |
|--------------------|----------------------------------------------------------------------------------|------------|
| gPNSI12            | $T_{AOX1}$                                                                       |            |
| pPICZ-Cas9-gPNSI13 | panARS, $Ble^R$ , $P_{HTX1}$ -Cas9- $T_{DAS1}$ , $P_{HTX1}$ -gPNSI13- $T_{AOX1}$ | (1)        |
| pCAI-gPNSII-4      | panARS, $KanMX$ , $P_{HTX1}$ -gPNSII-4- $T_{AOX1}$                               | (1)        |
| pCAI-gPNSIII-5     | panARS, $KanMX$ , $P_{HTX1}$ -gPNSIII-5- $T_{AOX1}$                              | (1)        |
| pCAI-gFAA1t        | panARS, $KanMX$ , $P_{HTX1}$ -gFAA1t- $T_{AOX1}$                                 | This study |
| pCAI-gFAA2t        | panARS, $KanMX$ , $P_{HTX1}$ -gFAA2t- $T_{AOX1}$                                 | This study |

---

**Table S2. Strains used in this study**

| Strain name                                  | Genotype                                                                                                                                                                                                                                                                                                                                                                                                                                                | Resource or Reference |
|----------------------------------------------|---------------------------------------------------------------------------------------------------------------------------------------------------------------------------------------------------------------------------------------------------------------------------------------------------------------------------------------------------------------------------------------------------------------------------------------------------------|-----------------------|
| GS115                                        | Mut <sup>+</sup> , <i>his4</i> , <i>AOX1</i> , <i>AOX2</i>                                                                                                                                                                                                                                                                                                                                                                                              | From Pro Cai          |
| XC01                                         | <i>MATa</i> ; <i>MAL2-8c</i> ; <i>SUC2</i> ; <i>his3Δ1</i> ; <i>ura3-52</i> ; <i>XI-5::P<sub>TEF1</sub>-Cas9-T<sub>CYC1</sub></i>                                                                                                                                                                                                                                                                                                                       | Lab reserved          |
| PC110                                        | GS115, <i>HIS4::P<sub>GAP</sub>-PpRAD52-T<sub>AOX1</sub></i>                                                                                                                                                                                                                                                                                                                                                                                            | This study            |
| PC111B                                       | PC110, <i>PNSI-2::P<sub>GAP</sub>-hCas9-T<sub>DAS1</sub></i>                                                                                                                                                                                                                                                                                                                                                                                            | This study            |
| <b>Engineered strains for FFA production</b> |                                                                                                                                                                                                                                                                                                                                                                                                                                                         |                       |
| PC113B                                       | Mut <sup>+</sup> , <i>his</i> <sup>-</sup> , <i>AOX1</i> , <i>AOX2</i> , <i>his4Δ::P<sub>GAP</sub>-PpRAD52-T<sub>AOX1</sub></i> , <i>PNSI-3::P<sub>GAP</sub>-hCas9-T<sub>DAS1</sub></i> , <i>faa1Δ,faa2Δ</i><br>=[PC111B]+( <i>faa1Δ,faa2Δ</i> )                                                                                                                                                                                                        | This study            |
| PC121                                        | Mut <sup>+</sup> , <i>his</i> <sup>-</sup> , <i>AOX1</i> , <i>AOX2</i> , <i>his4Δ::P<sub>GAP</sub>-PpRAD52-T<sub>AOX1</sub></i> , <i>PNSI-3::P<sub>GAP</sub>-hCas9-T<sub>DAS1</sub></i> , <i>faa1Δ,faa2Δ</i> ,<br><i>PNSI2::P<sub>AOX1</sub>-MmACL-KpOpt1-T<sub>FAA1</sub></i> =[PC113B]+( <i>PNSI2::P<sub>AOX1</sub>-MmACL-KpOpt1-T<sub>FAA1</sub></i> )                                                                                               | This study            |
| PC122                                        | Mut <sup>+</sup> , <i>his</i> <sup>-</sup> , <i>AOX1</i> , <i>AOX2</i> , <i>his4Δ::P<sub>GAP</sub>-PpRAD52-T<sub>AOX1</sub></i> , <i>PNSI-3::P<sub>GAP</sub>-hCas9-T<sub>DAS1</sub></i> , <i>faa1Δ,faa2Δ</i> , <i>PNSI-2::P<sub>AOX1</sub>-MmACL-KpOpt1-T<sub>FAA1</sub></i> , <i>PNSI-4::P<sub>FLD1</sub>-ScIDP2o-T<sub>DAS2</sub></i> =[PC121]+( <i>PNSI-4::P<sub>FLD1</sub>-ScIDP2o-T<sub>DAS2</sub></i> )                                           | This study            |
| PC123                                        | Mut <sup>+</sup> , <i>his</i> <sup>-</sup> , <i>AOX1</i> , <i>AOX2</i> , <i>his4Δ::P<sub>GAP</sub>-PpRAD52-T<sub>AOX1</sub></i> , <i>PNSI-3::P<sub>GAP</sub>-hCas9-T<sub>DAS1</sub></i> , <i>faa1Δ,faa2Δ</i> , <i>PNSI-2::P<sub>AOX1</sub>-MmACL-KpOpt1-T<sub>FAA1</sub></i> , <i>PNSI-4::P<sub>FLD1</sub>-ScIDP2o-T<sub>DAS2</sub></i> , <i>PNSIII-5::BbXFPK-P<sub>HTX1</sub>-CkPTA</i><br>=[PC122]+( <i>PNSIII-5::BbXFPK-P<sub>HTX1</sub>-CkPTA</i> ) | This study            |

|        |                                                                                                                                                                                                                                                                                                                                                                                                                                        |            |
|--------|----------------------------------------------------------------------------------------------------------------------------------------------------------------------------------------------------------------------------------------------------------------------------------------------------------------------------------------------------------------------------------------------------------------------------------------|------------|
| PC124  | <p>Mut<sup>+</sup>, his<sup>-</sup>, AOX1, AOX2, his4Δ::P<sub>GAP</sub>-PpRAD52-T<sub>AOX1</sub>, PNSI-3::P<sub>GAP</sub>-hCas9-T<sub>DAS1</sub>, faa1Δ,faa2Δ, PNSI-2::P<sub>AOX1</sub>-MmACL-KpOpt1-T<sub>FAA1</sub>, PNSI-4::P<sub>FLD1</sub>-ScIDP2o-T<sub>DAS2</sub>, PNSIII-5::BbXFPK-P<sub>HTX1</sub>-CkPTA, PNSII-4::P<sub>DAS2</sub>-DAS2-T<sub>GAP</sub></p> <p>=[PC123]+(PNSII-4::P<sub>DAS2</sub>-DAS2-T<sub>GAP</sub>)</p> | This study |
| PC124H | <p>Mut<sup>+</sup>, his<sup>-</sup>, AOX1, AOX2, PNSI-3::P<sub>GAP</sub>-hCas9-T<sub>DAS1</sub>, faa1Δ,faa2Δ, PNSI-2::P<sub>AOX1</sub>-MmACL-KpOpt1-T<sub>FAA1</sub>, PNSI-4::P<sub>FLD1</sub>-ScIDP2o-T<sub>DAS2</sub>,PNSIII-5::BbXFPK-P<sub>HTX1</sub>-CkPTA, PNSII-4::P<sub>DAS2</sub>-DAS2-T<sub>GAP</sub>, his4Δ::HIS4</p> <p>=[PC124]+(his4Δ::HIS4)</p>                                                                         | This study |

#### Engineered strains for fatty alcohol production

|       |                                                                                                                                                                                                                                                                                                                                                                                                                                                                                                      |            |
|-------|------------------------------------------------------------------------------------------------------------------------------------------------------------------------------------------------------------------------------------------------------------------------------------------------------------------------------------------------------------------------------------------------------------------------------------------------------------------------------------------------------|------------|
| PC170 | <p>Mut<sup>+</sup>, his<sup>-</sup>, AOX1, AOX2, his4Δ::P<sub>GAP</sub>-PpRAD52-T<sub>AOX1</sub>, PNSI-3::P<sub>GAP</sub>-hCas9-T<sub>DAS1</sub>, FAA1t::P<sub>TEF1</sub>-FaCoAR-KpOpt1-T<sub>FBP1t</sub>=[PC111B]+(FAA1t::P<sub>TEF1</sub>-FaCoAR-KpOpt1-T<sub>FBP1</sub>)</p>                                                                                                                                                                                                                      | This study |
| PC171 | <p>Mut<sup>+</sup>, his<sup>-</sup>, AOX1, AOX2, his4Δ::P<sub>GAP</sub>-PpRAD52-T<sub>AOX1</sub>, PNSI-3::P<sub>GAP</sub>-hCas9-T<sub>DAS1</sub>, faa2Δ, PNSI-2::P<sub>AOX1</sub>-MmACL-KpOpt1-T<sub>FAA1</sub>, PNSI-4::P<sub>FLD1</sub>-ScIDP2o-T<sub>DAS2</sub>, PNSIII-5::BbXFPK-P<sub>HTX1</sub>-CkPTA, PNSII-4::P<sub>DAS2</sub>-DAS2-T<sub>GAP</sub>, faa1Δ::FAA1 = [PC124]+(faa1Δ::FAA1)</p>                                                                                                 | This study |
| PC172 | <p>Mut<sup>+</sup>, his<sup>-</sup>, AOX1, AOX2, his4Δ::P<sub>GAP</sub>-PpRAD52-T<sub>AOX1</sub>, PNSI-3::P<sub>GAP</sub>-hCas9-T<sub>DAS1</sub>, faa2Δ, PNSI-2::P<sub>AOX1</sub>-MmACL-KpOpt1-T<sub>FAA1</sub>, PNSI-4::P<sub>FLD1</sub>-ScIDP2o-T<sub>DAS2</sub>, PNSIII-5::BbXFPK-P<sub>HTX1</sub>-CkPTA, PNSII-4::P<sub>DAS2</sub>-DAS2-T<sub>GAP</sub>, faa1Δ::FAA1+P<sub>TEF1</sub>-FaCoAR-KpOpt1-T<sub>FBP1</sub> = [PC124]+(faa1Δ::FAA1+P<sub>TEF1</sub>-FaCoAR-KpOpt1-T<sub>FBP1</sub>)</p> | This study |
| PC173 | <p>Mut<sup>+</sup>, his<sup>-</sup>, AOX1, AOX2, his4Δ::P<sub>GAP</sub>-PpRAD52-T<sub>AOX1</sub>, PNSI-3::P<sub>GAP</sub>-hCas9-T<sub>DAS1</sub>, faa2Δ, PNSI-2::P<sub>AOX1</sub>-</p>                                                                                                                                                                                                                                                                                                               | This study |

---

|        |                                                                                                                                                                                                                                                                                                                                                                                                                                                                                                                                                                                                                                          |            |
|--------|------------------------------------------------------------------------------------------------------------------------------------------------------------------------------------------------------------------------------------------------------------------------------------------------------------------------------------------------------------------------------------------------------------------------------------------------------------------------------------------------------------------------------------------------------------------------------------------------------------------------------------------|------------|
|        | <i>MmACL-KpOpt1-T<sub>FAA1</sub>, PNSI-4::P<sub>FLD1</sub>-ScIDP2o-T<sub>DAS2</sub>, PNSIII-5::BbXFPK-P<sub>HTX1</sub>-CkPTA, PNSII-4::P<sub>DAS2</sub>-DAS2-T<sub>GAP</sub>, faa1Δ::FAA1+P<sub>TEF1</sub>-FaCoAR-KpOpt1-T<sub>FBP1</sub>, hfd1Δ</i> =[PC172]+( <i>hfd1Δ</i> )                                                                                                                                                                                                                                                                                                                                                           |            |
| PC174  | Mut <sup>+</sup> , <i>his</i> <sup>-</sup> , AOX1, AOX2, <i>his4Δ::P<sub>GAP</sub>-PpRAD52-T<sub>AOX1</sub>, PNSI-3::P<sub>GAP</sub>-hCas9-T<sub>DAS1</sub>, faa2Δ, PNSI-2::P<sub>AOX1</sub>-MmACL-KpOpt1-T<sub>FAA1</sub>, PNSI-4::P<sub>FLD1</sub>-ScIDP2o-T<sub>DAS2</sub>, PNSIII-5::BbXFPK-P<sub>HTX1</sub>-CkPTA, PNSII-4::P<sub>DAS2</sub>-DAS2-T<sub>GAP</sub>, faa1Δ::FAA1+P<sub>TEF1</sub>-FaCoAR-KpOpt1-T<sub>FBP1</sub>, hfd1Δ::P<sub>TEF1</sub>-FaCoAR-KpOpt1-T<sub>FBP1</sub></i><br>=[PC173]+( <i>hfd1Δ::P<sub>TEF1</sub>-FaCoAR-KpOpt1-T<sub>FBP1</sub></i> )                                                            | This study |
| PC175  | Mut <sup>+</sup> , <i>his</i> <sup>-</sup> , AOX1, AOX2, <i>his4Δ::P<sub>GAP</sub>-PpRAD52-T<sub>AOX1</sub>, PNSI-3::P<sub>GAP</sub>-hCas9-T<sub>DAS1</sub>, PNSI-2::P<sub>AOX1</sub>-MmACL-KpOpt1-T<sub>FAA1</sub>, PNSI-4::P<sub>FLD1</sub>-ScIDP2o-T<sub>DAS2</sub>, PNSIII-5::BbXFPK-P<sub>HTX1</sub>-CkPTA, PNSII-4::P<sub>DAS2</sub>-DAS2-T<sub>GAP</sub>, faa1Δ::FAA1+P<sub>TEF1</sub>-FaCoAR-KpOpt1-T<sub>FBP1</sub>, hfd1Δ::P<sub>TEF1</sub>-FaCoAR-KpOpt1-T<sub>FBP1</sub>, faa2Δ::FAA2</i><br>=[PC174]+( <i>faa2Δ::FAA2</i> )                                                                                                 | This study |
| PC176  | Mut <sup>+</sup> , <i>his</i> <sup>-</sup> , AOX1, AOX2, <i>his4Δ::P<sub>GAP</sub>-PpRAD52-T<sub>AOX1</sub>, PNSI-3::P<sub>GAP</sub>-hCas9-T<sub>DAS1</sub>, PNSI-2::P<sub>AOX1</sub>-MmACL-KpOpt1-T<sub>FAA1</sub>, PNSI-4::P<sub>FLD1</sub>-ScIDP2o-T<sub>DAS2</sub>, PNSIII-5::BbXFPK-P<sub>HTX1</sub>-CkPTA, PNSII-4::P<sub>DAS2</sub>-DAS2-T<sub>GAP</sub>, faa1Δ::FAA1+P<sub>TEF1</sub>-FaCoAR-KpOpt1-T<sub>FBP1</sub>, hfd1Δ::P<sub>TEF1</sub>-FaCoAR-KpOpt1-T<sub>FBP1</sub>, faa2Δ::FAA2+P<sub>TEF1</sub>-FaCoAR-KpOpt1-T<sub>FBP1</sub></i><br>=[PC175]+( <i>faa2Δ::FAA2+P<sub>TEF1</sub>-FaCoAR-KpOpt1-T<sub>FBP1</sub></i> ) | This study |
| PC174H | Mut <sup>+</sup> , <i>his</i> <sup>-</sup> , AOX1, AOX2, <i>his4Δ::HIS4, PNSI-3::P<sub>GAP</sub>-hCas9-T<sub>DAS1</sub>, PNSI-2::P<sub>AOX1</sub>-MmACL-KpOpt1-T<sub>FAA1</sub>, PNSI-4::P<sub>FLD1</sub>-ScIDP2o-T<sub>DAS2</sub>, PNSIII-5::BbXFPK-P<sub>HTX1</sub>-CkPTA, PNSII-4::P<sub>DAS2</sub>-DAS2-T<sub>GAP</sub>, faa1Δ::FAA1+P<sub>TEF1</sub>-FaCoAR-KpOpt1-T<sub>FBP1</sub>, hfd1Δ::P<sub>TEF1</sub>-FaCoAR-KpOpt1-T<sub>FBP1</sub>, faa2Δ::FAA2+P<sub>TEF1</sub>-FaCoAR-KpOpt1-T<sub>FBP1</sub></i><br>=[PC174]+( <i>his4Δ::HIS4</i> )                                                                                     | This study |

---

---

**Table S3. Primers used in this study.**

| Primer No.                                   | Name            | Sequence (5' - 3')                                                                                |
|----------------------------------------------|-----------------|---------------------------------------------------------------------------------------------------|
| <b>Primers for gRNA plasmid construction</b> |                 |                                                                                                   |
| P1                                           | AOX1t-Kpn-ARS-R | AAACGTCAAATCATAATCAGCACTAGGTACCGCACAAACGAACGTCTCACTTAATCTTC                                       |
| P2                                           | HTX1-Cas9-F     | GGAGTACTTCTTGTCCATCGTTTCGACTAGTTGTTGTAGTTTTAATATAGTTTGAGTATGAGATGGAACTC                           |
| P3                                           | gPOX1-F         | GATTTTCTGATGAGTCCGTGAGGACGAAACGAGTAAGCTCGTCAAATCTTGGGACTTTCCGGGTTTAGAGCTAGAAATAGCAAGTTAAAATAAGGCT |
| P4                                           | gPOX1-R         | GTTTCGTCCTCACGGACTCATCAGAAAATCTTTGATTTGTTTAGGTAAGTGAAGTGGATGTATTAGTTGG                            |
| P5                                           | gFAA1t-F        | GAAGCTATGAATGAAAAGCAGTTTTAGAGCTAGAAATAGCAAGTTAAAATAAGGCTAG                                        |
| P6                                           | gFAA1t-R        | TGCTTTTCATTCATAGCTTCGACGAGCTTACTCGTTTCGTCC                                                        |
| P7                                           | gFAA2t-F        | AAAAATGAAATAAAAAACAGTTTTAGAGCTAGAAATAGCAAGTTAAAATAAGGCTAG                                         |
| P8                                           | gFAA2t-R        | CTGTTTTTTATTTCAATTTTTGACGAGCTTACTCGTTTCGTCC                                                       |

**Primers for seamless gene deletion of POX1**

---

|     |              |                                                     |
|-----|--------------|-----------------------------------------------------|
| P9  | POX1-HRUP-F  | GTCAAGTTGTATAGCATAGAACAAGAATGGAAG                   |
| P10 | POX1-HRUP-R1 | CGTAATCAATACACCGTTGTGATTTTCAGTTGTTAGACTGGTTAAAAAAG  |
| P11 | POX1-HRDN-F1 | ACTGAAAATCACAACGGTGTATTGATTACGTAGTAATGCTATCACAAAGTA |
| P12 | POX1-HRDN-R  | GAAGCTTCTTCGTAGCTCTTCATCTTTC                        |

**Primers for engineering FFA production**

|     |                          |                                                              |
|-----|--------------------------|--------------------------------------------------------------|
| P13 | MmACL-KpOpt1-<br>AOX1p-F | AGATCAAAAAACAATAATTATTCGAAACGATGTCTGCCAAGGCCATCAG            |
| P14 | MmACL-KpOpt1-FAA1t-<br>R | GTCCGTAGAAAACCTTCAATCGGCTGCTCGCTCACATACTCATATGTTCTGGAAGGACAT |
| P15 | ScIDP2o-FLD1p-F          | TGCTTGTTTCATACAATTCTTGATATTCACAATGACAAAGATAAAGGTTGCAAACCCTA  |
| P16 | ScIDP2o-DAS2t-R          | AACTACTAACCCTAGTAGTGGCCAAATCTACTCAAAGTGCTGCTGCTTCGAAC        |
| P17 | ScYHM2o-TEF1p-F          | TCACTACATACATTTTAGTTATTCGCCAACATGCCATCTACTACTAATACCGCCG      |
| P18 | ScYHM2o-AOX1t-R          | CAGGCAAATGGCATTCTGACATCCTCTTGATCAATGTTTGGCGACTGGAGTCTC       |
| P19 | RtME-DAS2p-F             | TCACTCTTATCAAACATCAAACATCAAAAATGCCTGCTCATTGCCCC              |
| P20 | RtME-AOX1t-R             | CAGGCAAATGGCATTCTGACATCCTCTTGATCATTGTGCTTGTTGTTCTGCTTCTAATA  |

---

|     |                  |                                                            |
|-----|------------------|------------------------------------------------------------|
| P21 | RtME-FDH1p-F     | CAAATACCTCCAACATCACCCACTTAAACAATGCCTGCTCATTTTGCCCC         |
| P22 | ScMDH3-FLD1p-F   | TGCTTGTTTCATACAATTCTTGATATTCACAATGGTCAAAGTCGCAATTCTTGGC    |
| P23 | ScMDH3-DAS1t-R   | CTCCTAACTAAAAGTGTAAAGACTTCCCGTTCAAGAGTCTAGGATGAAACTCTTGCCT |
| P24 | ScMDH3-PMP20p-F  | AATCCCACCAAGCAAAAAAAAAAATCTAAGATGGTCAAAGTCGCAATTCTTGGC     |
| P25 | ScPYC1-DAS1p-F   | TTGATTTTATCTGGAGAATAATCGAACAAAATGTCGCAAAGAAAATTCGCCG       |
| P26 | ScPYC1-AOX1t-R   | CAGGCAAATGGCATTCTGACATCCTCTTGATCATGCCTTAGTTTCAACAGGAACTTGG |
| P27 | ScPYC1-FBA2p-F   | TTGATAAGGTAATTGATTAATTTTCATAAATATGTCGCAAAGAAAATTCGCCGG     |
| P28 | KpZWF1-DAK1p-F   | ACAGGAAACAAAGGAATTTATACACTTTAAATGACCGATACGAAAGCCGTAGAA     |
| P29 | KpZWF1t-PI10DN-R | AAGCAAAGTCCGAAGAAATCTCGAAAACACAGAAAATCAGGAGTAGAGTTGTGAAAAG |
| P30 | KpGND2-PEX5p-F   | ATTCTCAACCCAACCATCTAACTAATCGTAATGGTTGAAGCAACAGGAGATATTGG   |
| P31 | KpRPE1-2-R       | TTTTTCGAATAGCTAGGTGATATGAAGGAAAGGTA                        |
| P32 | KpGND2t-RPE2t-R  | CTTTCCTTCATATCACCTAGCTATTCGAAAAACAACACAGCAAATATATGGCTGTGC  |
| P33 | KpRPE1-2-F       | ATGGTTAAAACAATTATTGCTCCTTCAATCCTG                          |
| P34 | KpRPE1-1-R       | CAAGGCAACGGCCCTAGTGA                                       |
| P35 | KpRPE1-1-FLD1p-F | CTTTGCTTGTTTCATACAATTCTTGATATTCACAATGGTCAAACCTGTTATCGCTCC  |

---

|     |                 |                                                                |
|-----|-----------------|----------------------------------------------------------------|
| P36 | OpRPE-ADH2t-R   | CATTACATAAGACGTATACAAACTATTTCGGCTCACTCAAGAAGTCCGCGGG           |
| P37 | OpRPE-FLD1p-F   | TGCTTGTTTCATACAATTCTTGATATTCACAATGGTGAAACCAATTATTGCTCCCTC      |
| P38 | BbXFPKo-FDH1t-R | TTACTTAATATCAAATTAATAACATTTCAATTATTCATTATCACCAGCAGTAGCAGCAG    |
| P39 | BbXFPKo-HTX1p-F | TCATACTCAAACCTATATTTAAACTACAACAATGACTTCTCCTGTTATTGGTACTCCATG   |
| P40 | CkPTAo-HTX1p-F  | ATCCAGTTCAAGTTACCTAAACAAATCAAATGAAATTGATGGAAAATATTTTTGGTTTGGC  |
| P41 | CkPTAo-FBP1t-R  | AAATCTCGGAAACAGTGCCAATCGAACGCATTAACCTTGAGCTTGAGCTTGAACAGC      |
| P42 | DAS2-GAPt-R     | CGAATTTTCAGCTATTTTCACATACAAATCGATTTACAACCTTGTCATGCTTTGGTTTTCCC |
| P43 | DAS2p-F         | ATTACTGTTTTGGGCAATCCTGTTGATAAG                                 |

**Primers for constructing pathways for fatty alcohol production**

|     |                    |                                                                  |
|-----|--------------------|------------------------------------------------------------------|
| P44 | FAA1-CAT1t-R       | AATCTTTAATTAATAATAAATATAGTTAGCTCAACTGTTTTGCCTATATACTTCATCGACAC   |
| P45 | CAT1t-F            | GCTAACTATATTTATTATTAATTAAGATTCTTTAACTTCGG                        |
| P46 | CAT1t-FBP1t-R      | ATAGGGATAATAGAAAAGTAAGGTTCCGCGGTTTAGTTTTCTGATGATGTTTCGATCATCG    |
| P47 | FaCoAR-KpO-FBP1t-R | CAAATCTCGGAAACAGTGCCAATCGAACGCATCACCAGTAAATTCCTCTCATGATGGC       |
| P48 | FaCoAR-R1-TEF1p-F  | CTCACTACATACATTTTAGTTATTCGCCAACATGAACTACTTCCTTACCGGAGGTA         |
| P49 | FAA1DN-TEF1p-F     | AGTGCGGCAGATAAAAAGAGGCGACAGTTATCAACGTACTACGTAGTTCAATTGTACTTTTTTC |



---

|     |                |                                                                   |
|-----|----------------|-------------------------------------------------------------------|
| P50 | HFD1UP-TEF1p-R | AGTGCGGCAGATAAAAGAGGCGACAGTTATCAATGAAAAAGATGAATTGCCCAAATAGAAGAC   |
| P51 | HFD1DN-FBP1t-F | ATAGGGATAATAGAAAAGTAAGGTTCCGCGACTTTTATTGTTTCGTCTGTATCATCTGTTAAGAG |
| P52 | FAA2-GAPt-R    | GAATTTTCAGCTATTTTCACATACAAATCGATCTACATCTTAGTCTCCCTCAGAAGACTC      |
| P53 | FBP1t-GAPt-F   | CTTTCCGATCAAATTGGAATGGAAAATTGCCGCGGAACCTTACTTTTCTATTATCCCTA       |
| P54 | FAA2DN-TEF1p-F | AGTGCGGCAGATAAAAGAGGCGACAGTTATGGTATAGCTCAATGTGTCATTATCACAGG       |

---

#### SI References

1. P. Cai et al., Recombination machinery engineering facilitates metabolic engineering of the industrial yeast *Pichia pastoris*. *Nucleic Acids Res* **49**, 7791-7805 (2021).
